# Supplementary material for: Recurrent copy number alterations in young women with breast cancer
Source: PubMed Central journal article supplement (PMC5837756; doi:10.18632/oncotarget.24336), 2018-01-29
Supplement: oncotarget-09-11541-s001.pdf [file oncotarget-09-11541-s001.pdf]

## Recurrent copy number alterations in young women with breast cancer

### SUPPLEMENTARY MATERIALS

**Supplementary Table 1: Validated recurrent gain CNA regions without genes.** The first seven columns represent the chromosome number, inner and outer start and end coordinates of the recurrent CNA region, and the size of the region in base pairs (hg18). The last two columns are the sample sizes in both Discovery and Validation dataset, respectively. See Supplementary\_Table\_1

**Supplementary Table 2: Validated recurrent loss CNA regions without genes**

| Chromosome | InnerStart | InnerEnd  | Inner.CNV.<br>Size | OuterStart | OuterEnd  | Outer.<br>CNV.Size | Discovery.<br>Cluster.<br>Size | Validation.<br>Cluster.Size |
|------------|------------|-----------|--------------------|------------|-----------|--------------------|--------------------------------|-----------------------------|
| 1          | 16885044   | 16885329  | 285                | 16884038   | 16889666  | 5628               | 11                             | 15                          |
| 3          | 26589981   | 26589990  | 9                  | 26588205   | 26591799  | 3594               | 7                              | 7                           |
| 3          | 64855417   | 64863915  | 8498               | 64731448   | 64923169  | 191721             | 6                              | 5                           |
| 4          | 104455633  | 104467384 | 11751              | 104414905  | 104467384 | 52479              | 5                              | 5                           |
| 4          | 157100338  | 157107691 | 7353               | 157100332  | 157107969 | 7637               | 5                              | 7                           |
| 5          | 60888563   | 61017766  | 129203             | 60887533   | 61460364  | 572831             | 8                              | 10                          |
| 8          | 3552110    | 3554053   | 1943               | 3551271    | 3564930   | 13659              | 25                             | 21                          |
| 8          | 5633227    | 5636521   | 3294               | 5625845    | 5636589   | 10744              | 23                             | 17                          |
| 9          | 1490330    | 1490755   | 425                | 1456070    | 1504392   | 48322              | 6                              | 7                           |
| 9          | 1500170    | 1503092   | 2922               | 1490330    | 1504392   | 14062              | 6                              | 7                           |
| 13         | 22518343   | 22523101  | 4758               | 22512167   | 22523373  | 11206              | 10                             | 8                           |
| 13         | 56656317   | 56661149  | 4832               | 56656291   | 56661535  | 5244               | 15                             | 17                          |
| 18         | 36514797   | 36519362  | 4565               | 36514489   | 36519388  | 4899               | 9                              | 6                           |
| 18         | 61883719   | 61883744  | 25                 | 61878473   | 61885427  | 6954               | 5                              | 5                           |
| 22         | 20816553   | 20820788  | 4235               | 20816118   | 20833270  | 17152              | 9                              | 9                           |
| 15         | 22859182   | 22873331  | 14149              | 22846930   | 22875304  | 28374              | 6                              | 11                          |
| 17         | 33672360   | 33694008  | 21648              | 33664567   | 33752586  | 88019              | 9                              | 7                           |

The first seven columns represent the chromosome number, inner and outer start and end coordinates of the recurrent CNA region, and the size of the region in base pairs (hg18). The last two columns are the sample sizes in both Discovery and Validation dataset, respectively.

**Supplementary Table 3: Functional annotation of the validated recurrent CNA regions.** The identified recurrent CNA gain and loss regions are annotated for both inner regions (intersection region of all individual CNAs in a cluster) and outer regions (union region of all individual CNAs in a cluster) using software ANNOVAR. See Supplementary\_Table\_3
